# Supplementary material for: SAD-1 kinase controls presynaptic phase separation by relieving SYD-2/Liprin-α autoinhibition
Source: PubMed Central journal article supplement (PMC10695385; doi:10.1371/journal.pbio.3002421), 2023-12-04

**Figure 1A**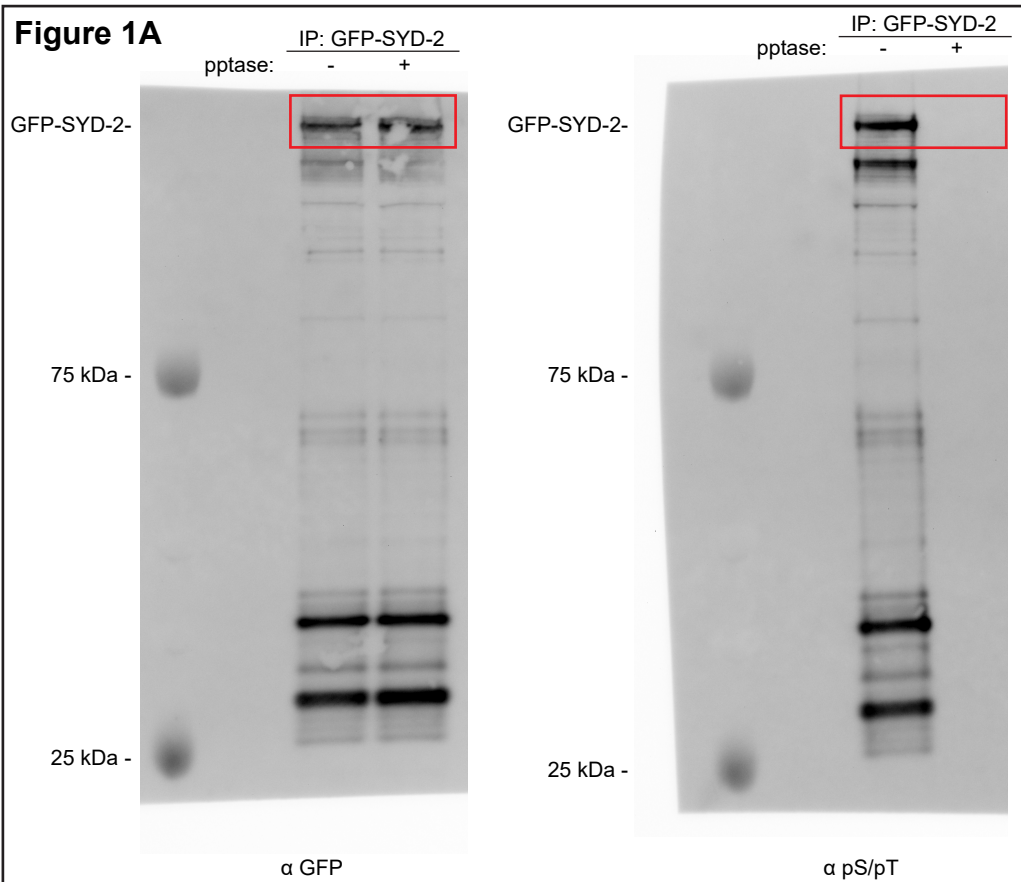**Figure 1B**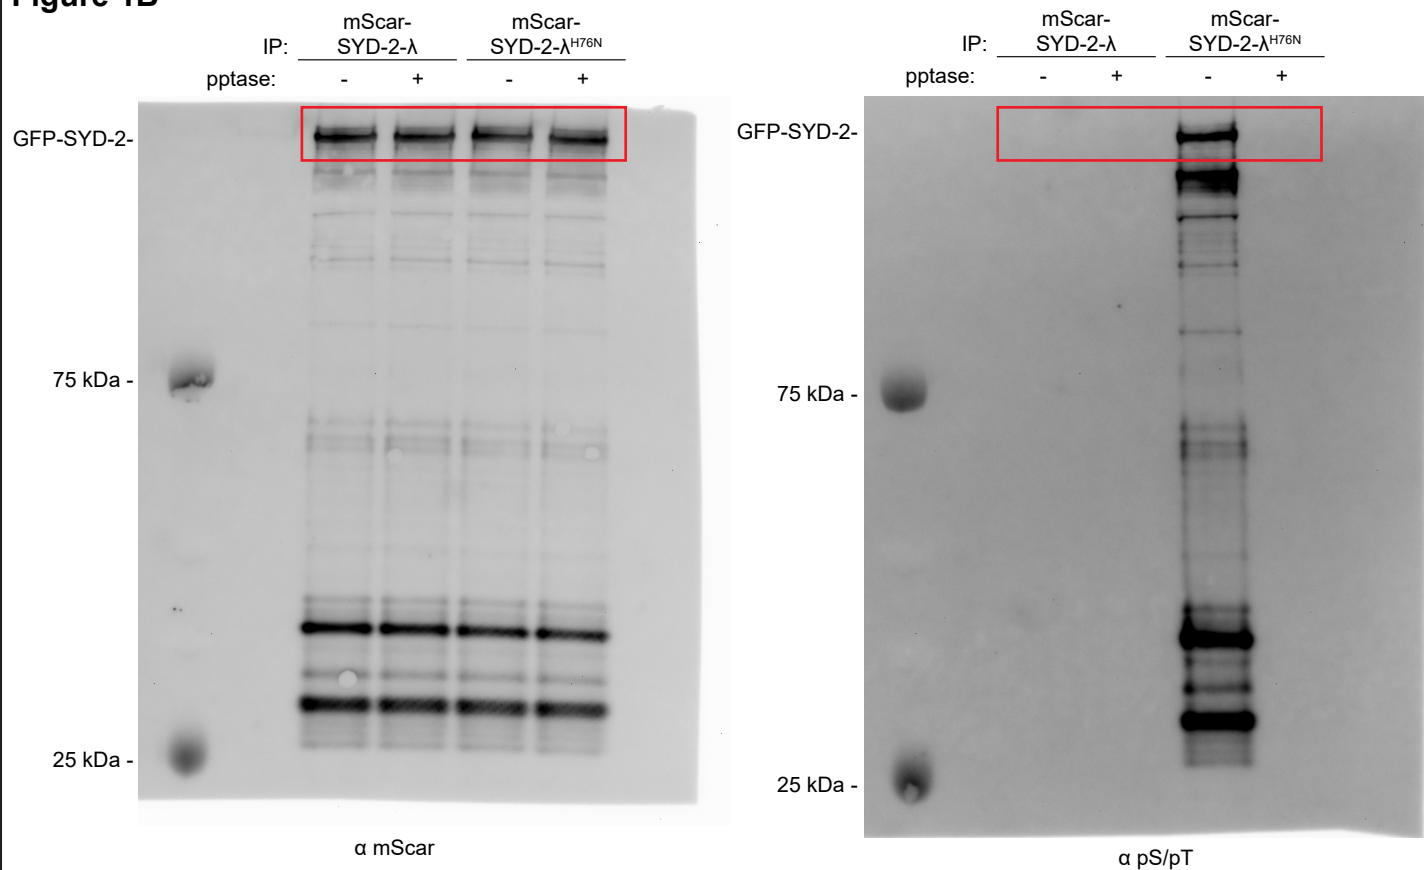

**Figure 3B & 3D**

**Coomassie**

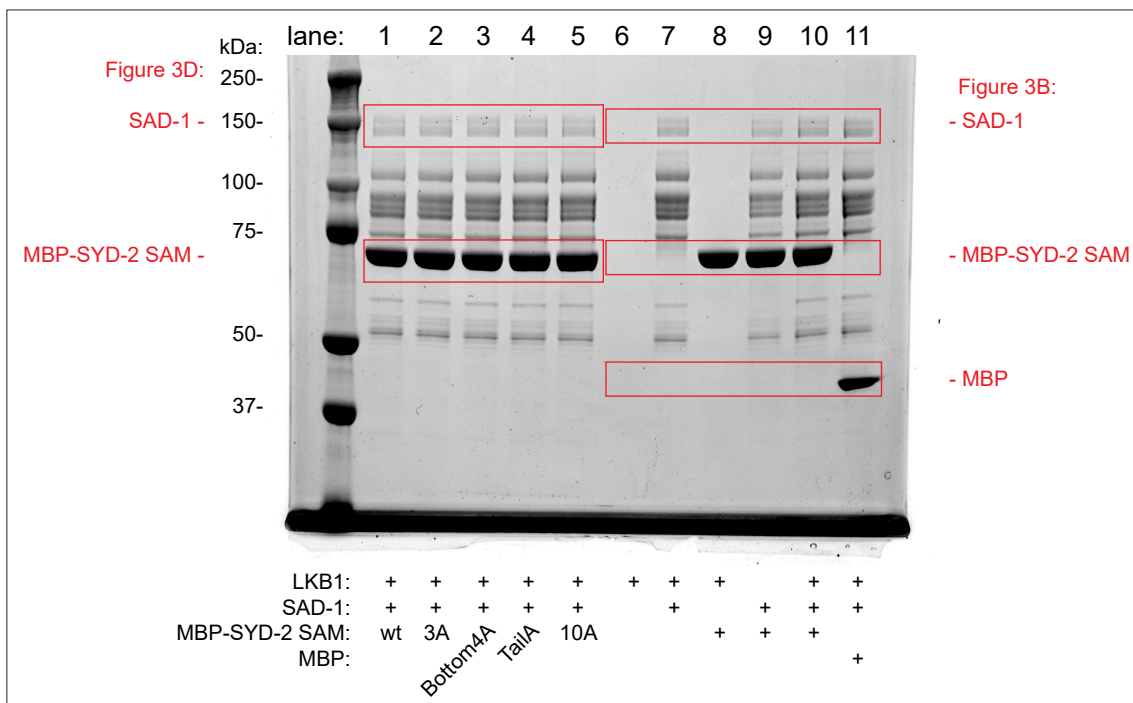

**<sup>32</sup>P low contrast**

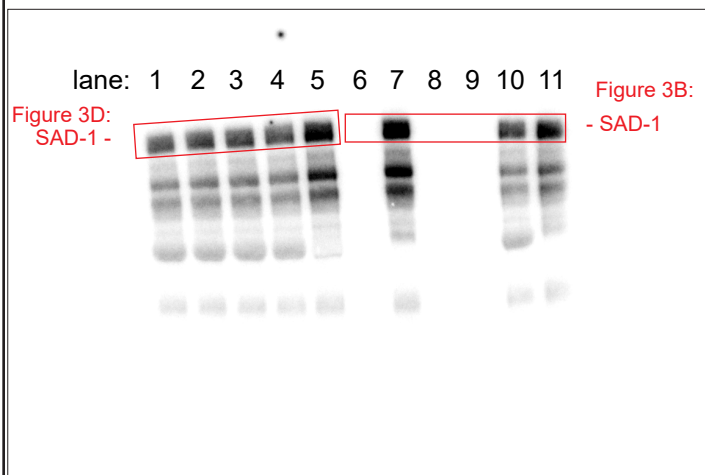

**<sup>32</sup>P high contrast**

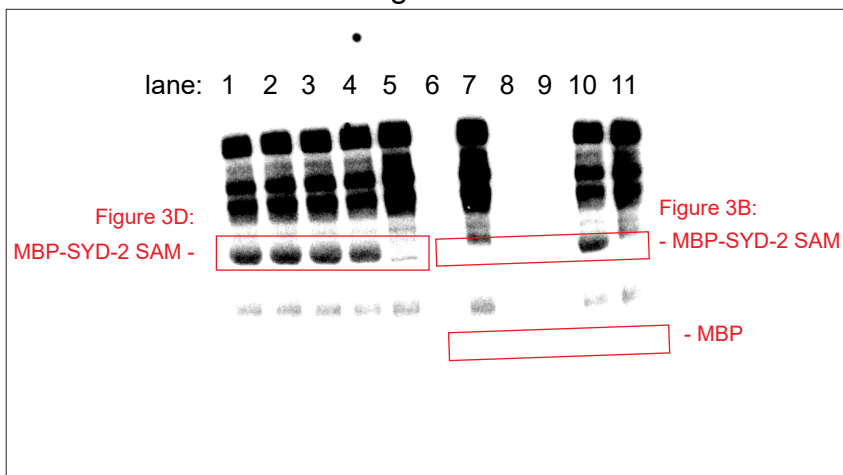

**Figure 7**

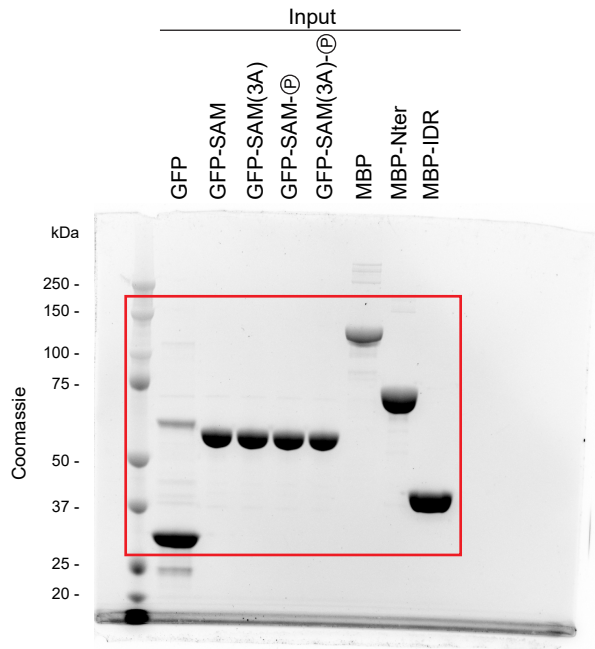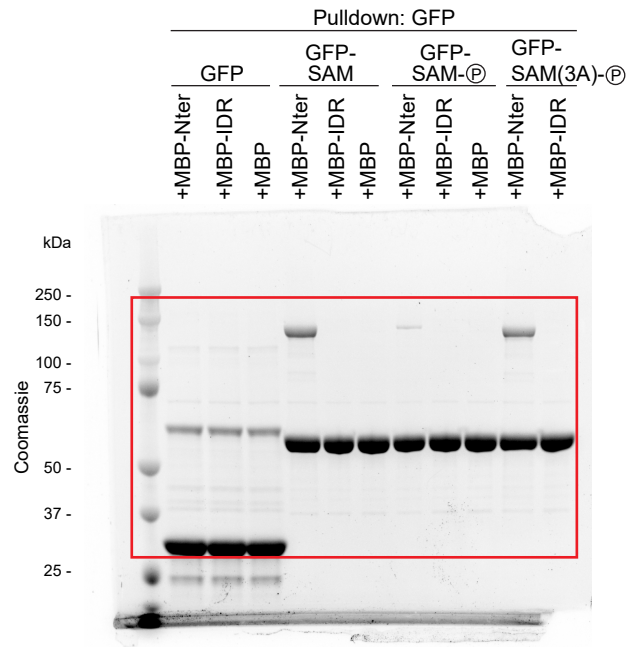

**Figure S4B**

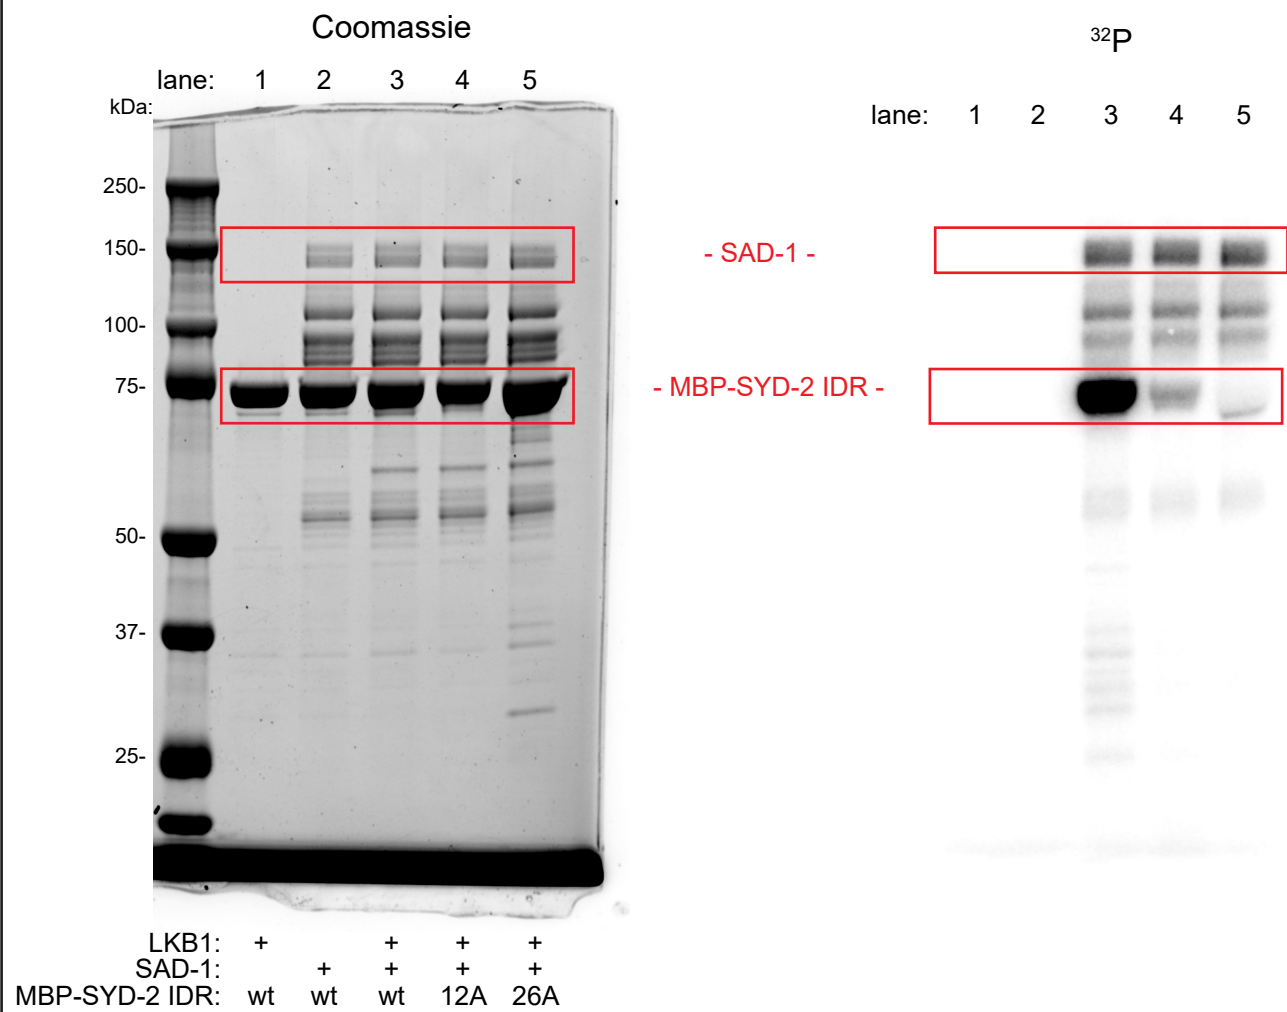

Supplement: pbio.3002421.s012.pdf [file pbio.3002421.s012.pdf]
